# Supplementary material
Source: PubMed Central journal article supplement (PMC8566214)
Supplement: kiab351_supplementary_data.pdf [file kiab351_supplementary_data.pdf]

```

CAH4  MSSRNVATALRMFATLGRSQAGEASAMMGTSALLAQRAAALGGASAVNKGCSRCRGRVA 60
CAH5  MSSRNVATALRMFATLGRSQAGEASAMMGTSALLAQRAAALGGASAVNKGACRCRGRVA 60
*****
          ↓
CAH4  CMGACMPMRHLHAHPNPPSDPDQALEYLREGNKR FVNNKPHDSHPTRNLDRVKATAAGQK 120
CAH5  CMGACMPMRHLHAHPNPPSDPDQALEYLREGNKR FVNNKPHDSHPTRNLDRVKATAAGQK 120
*****

CAH4  PFAAFLSCADSRVPVEIIFDQGFQGVFVTRVAGNIVTNEITASLEFGTAVLGSKVLMVLG 180
CAH5  PFAAFLSCADSRVPVEIIFDQGFQGVFVTRVAGNIVTNEITASLEFGTAVLGSKVLMVLG 180
*****

CAH4  HSACGAVAATMNGAAVPGVISSLYYSISPCKKAQAGDVDGAI AENVKVQMEQLKVSPVL 240
CAH5  HSACGAVAATMNGAAVPGVISSLYYSISPCKKAQAGDVDGAI AENVKVQMEQLKVSPVL 240
*****

CAH4  QGLVKEGK LKIVGGVYDLATGKVTEIA- 267
CAH5  QGLVKEGK LKIVGGVYDLATGKVTEIA* 267
*****

```

**Supplemental Figure S1.** Multiple sequence alignment of the CAH4 and CAH5 protein sequence. Arrow indicates the transit peptide cleavage site.

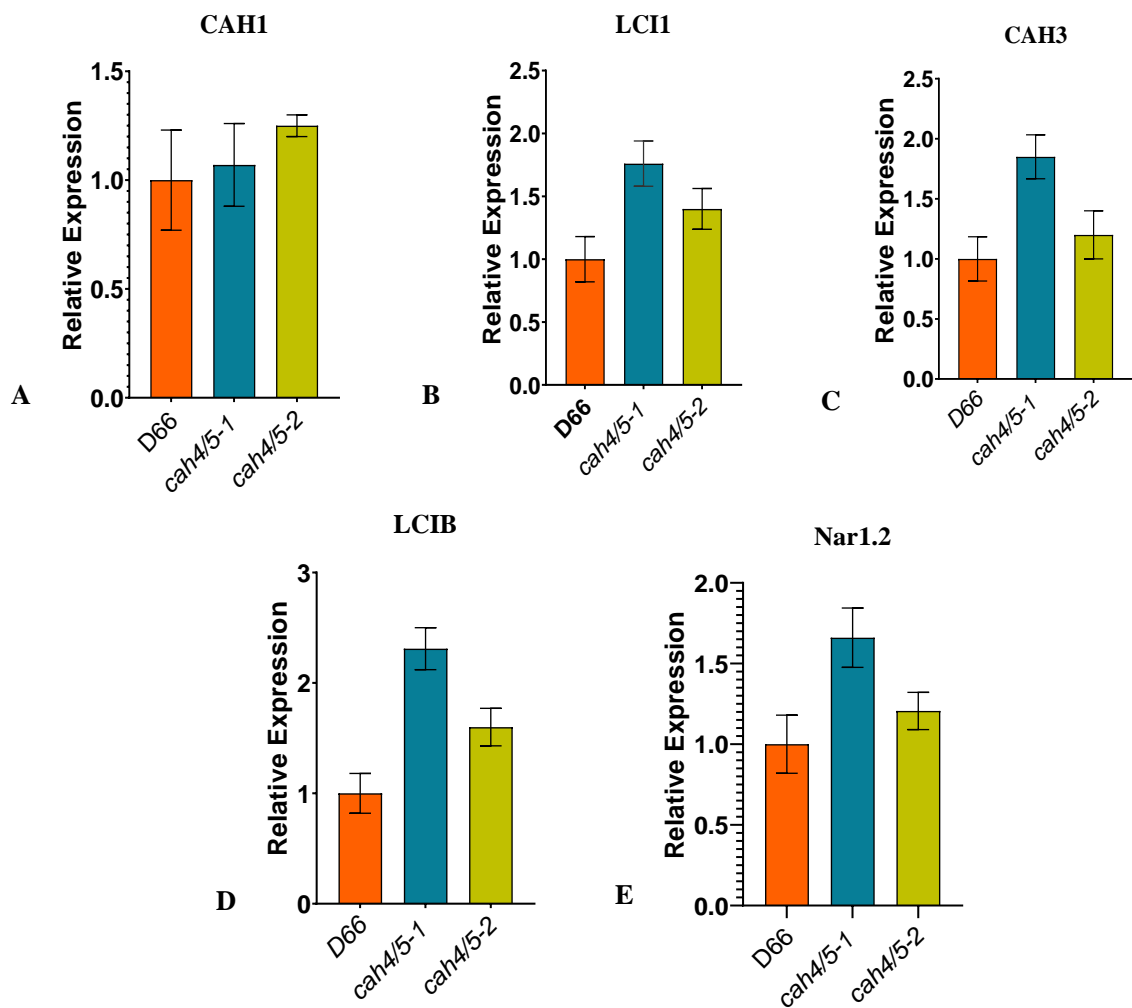

**Supplemental Figure S2.**

**Supplemental Figure S2.** RT-qPCR of other CCM genes. The figure shows comparative relative expression of CCM genes in wild type (D66) and RNAi knockdown strains for (A) *CAH1* (B) *LCI1* (C) *CAH3* (D) *LCIB* (E) *Nar1.2*. Error bars represent standard deviation from three biological replicates. For all the CCM genes, transcript levels were calculated using  $2^{-\Delta\Delta C_T}$  relative to the reference gene *CBLP* and reported relative to the corresponding wild type D66 cells.

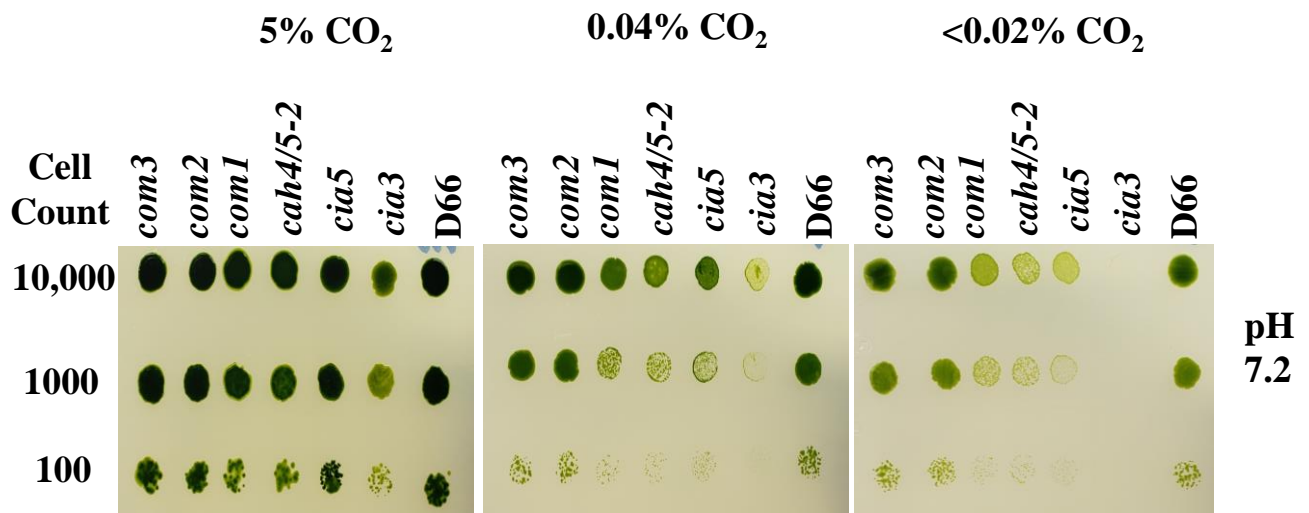

**Supplemental Figure S3.**

**Supplemental Figure S3.** Growth of strains complementing the *cah4/5* RNAi knockdown line at different CO<sub>2</sub> levels. Growth analysis showing D66, *cah4/5-2*, *cia3*, *cia5*, *com1*, *com2* and *com3*. Cells were diluted to  $6.6 \times 10^6$  cells ml<sup>-1</sup>, followed by 1:10 serial dilution 3 times at very low CO<sub>2</sub>, ambient CO<sub>2</sub> and high CO<sub>2</sub> at pH 7.2. Cells were grown for 6 days. The *cia3* and *cia5* mutants were included as a CCM-deficient control. Cells were initially grown in TAP media at low CO<sub>2</sub> in the light before spotting them onto plates.

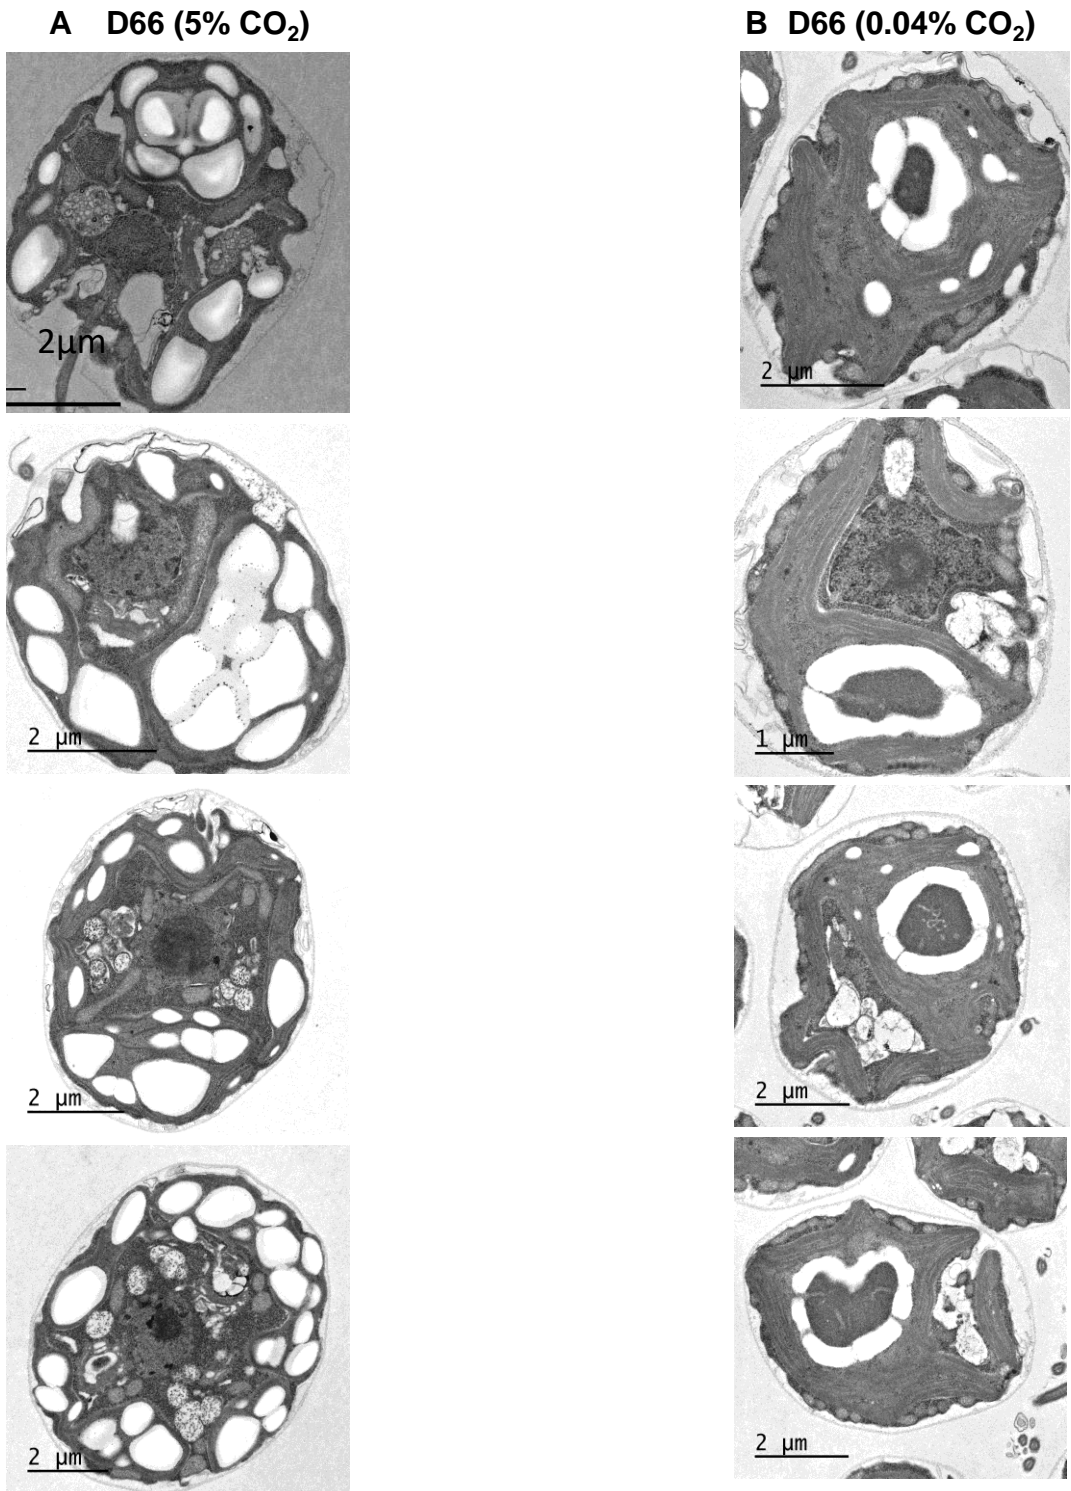

**Supplemental Figure S4.**

**Supplemental Figure S4 .** Additional TEM images of whole cells of the D66 strain. Images were from (A) high CO<sub>2</sub> and (B) ambient CO<sub>2</sub> levels. At ambient levels of CO<sub>2</sub>, the mitochondria are arranged along the plasma membrane of the Chlamydomonas cell.

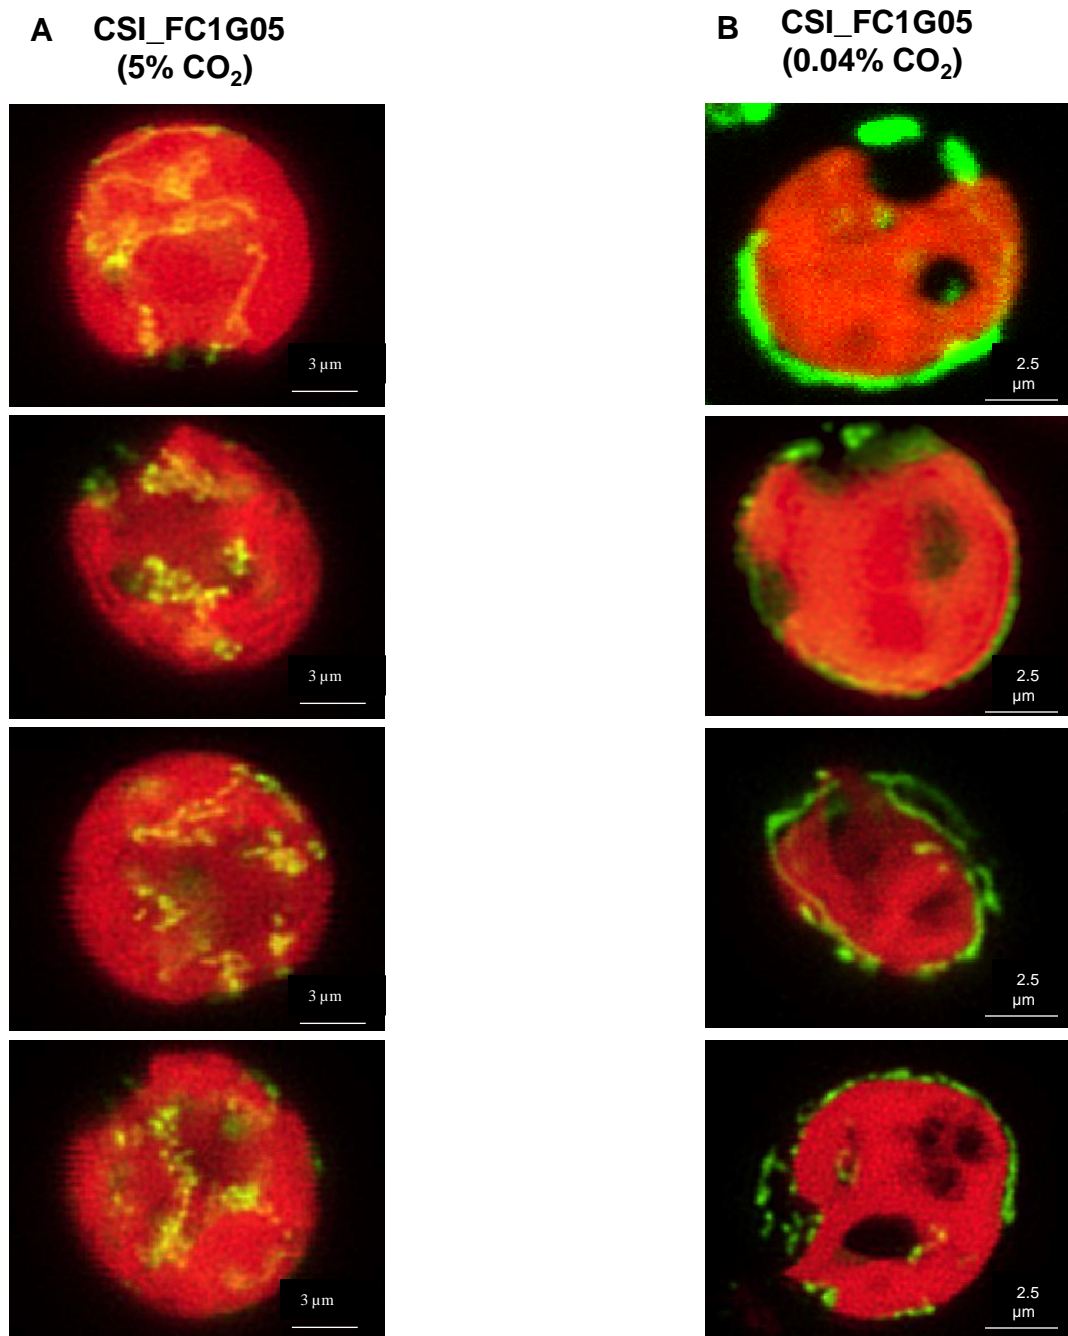

### Supplemental Figure S5.

**Supplemental Figure S5** . Additional confocal images of whole cells of the CSI\_FC1G05 expressing pLM005-CAH5-Venus-3xFLAG. Images were from (A) high CO<sub>2</sub> and (B) ambient CO<sub>2</sub> levels. At ambient levels of CO<sub>2</sub>, the CAH5 proteins are localized along the periphery of the Chlamydomonas cell.

**Supplemental Table S1** . List of primers used in this study. For the two miRNA primers the underlined nucleotides are the ones used to target the *CAH4* and *CAH5* gene. Please move the table heading so that it is located above the table.

| miRNA   | Sequence                                                                                                       |
|---------|----------------------------------------------------------------------------------------------------------------|
| CAH4/5F | ctagtCCGAGTCTAGATAGCTGTCAA <u>tctcgctgatcggcaccatgggggtggtg</u><br>gtgatcagcgcta <u>TTGAGAGCTATCTAGACTCGG</u>  |
| CAH4/5R | ctagcCCGAGTCTAGATAGCTCTCAA <u>tagcgctgatcaccaccacccccatggt</u><br>gccgatcagcgaga <u>TTGACAGCTATCTAGACTCGGA</u> |

| qPCR     | Sequence                   |
|----------|----------------------------|
| CAH4/5 F | TCAGCCCGGCCTGCAAGAAGG      |
| CAH4/5 R | CGCACACGCCCACGATCT         |
| CBLP F   | ATGTGCTGTCCGTGGCTTTC       |
| CBLP R   | CAGACCTTGACCATCTTGTC       |
| CAH3 F   | ATTCGATTTCGCCTACGGCA       |
| CAH3 R   | CATGTTGCCAATGAACGCCA       |
| LCIB F   | TGATCAAGCACTTCCCCTCG       |
| LCIB R   | GAGCCGAAGATGGCCTCAAT       |
| CAH1 F   | ACGCGCACCTGGCCTCAAT        |
| CAH1 R   | GTTGGCGTACCTGGGGGTTGCGGAA  |
| CCP1 F   | ACCAAGGCCGACCTCAACTACCTG   |
| CCP1 R   | CAGTCCATCGTGGACGAGTACTGGGG |
| HLA3 F   | AGCAGACCATCAAGAAGGTGTTGACG |
| HLA3 R   | GCAGCTTCGAGGGGCGACTCG      |
| NAR1.2 F | GTGTGCTGCGCCGTGTGGTC       |
| NAR1.2 R | GCCCAGCATCATGCCAGAGGAATCA  |
